# Supplementary material for: Improved Macaca fascicularis gene annotation reveals evolution of gene expression profiles in multiple tissues
Source: BMC Genomics. 2018 Nov 1;19:787. doi: 10.1186/s12864-018-5183-y (PMC6211470; doi:10.1186/s12864-018-5183-y)
Supplement: Supplementary file 9 — Table S5. The details of each M. fascicularis. (XLSX 10 kb) [file 12864_2018_5183_MOESM9_ESM.xlsx]

## Sheet: Sheet1
Table S5. The details of each M. fascicularis
sampleID	gender	age	weight	remarks	housing condition
2-17	M	4	2.7	for sampling different tissues	grouped outdoor
3-8	M	16	7.7	for sampling immune cells
3-7	M	15	6.0
3-18	F	16	3.4
